1 **INTERIM REPORT: SAFETY AND IMMUNOGENICITY OF AN INACTIVATED VACCINE**  
2 **AGAINST SARS-COV-2 IN HEALTHY CHILEAN ADULTS IN A PHASE 3 CLINICAL TRIAL**

3

4 **Brief Title:** CoronaVac03CL Phase 3 Interim Analysis of Safety and Immunogenicity.

5

6 Susan M Bueno<sup>1,2\*</sup>, Katia Abarca<sup>1,3</sup>, Pablo A González<sup>1,2</sup>, Nicolás MS Gálvez<sup>1,2</sup>, Jorge A Soto<sup>1,2</sup>,  
7 Luisa F Duarte<sup>1,2</sup>, Bárbara M Schultz<sup>1,2</sup>, Gaspar A Pacheco<sup>1,2</sup>, Liliana A González<sup>1,2</sup>, Yaneisi  
8 Vázquez<sup>1,2</sup>, Mariana Ríos<sup>1,2</sup>, Felipe Melo-González<sup>1,2</sup>, Daniela Rivera-Pérez<sup>1,2</sup>, Carolina  
9 Iturriaga<sup>3</sup>, Marcela Urzúa<sup>3</sup>, Angélica Dominguez<sup>4</sup>, Catalina A Andrade<sup>1,2</sup>, Roslye V Berrios<sup>1,2</sup>,  
10 Gisela Canedo-Marroquín<sup>1,2</sup>, Camila Covián<sup>1,2</sup>, Daniela Moreno-Tapia<sup>1,2</sup>, Farides Saavedra<sup>1,2</sup>,  
11 Omar P Vallejos<sup>1,2</sup>, Paulina Donato<sup>5</sup>, Pilar Espinoza<sup>6,7</sup>, Daniela Fuentes<sup>8</sup>, Marcela González<sup>9,10</sup>,  
12 Paula Guzmán<sup>11</sup>, Paula Muñoz-Venturelli<sup>12</sup>, Carlos M Pérez<sup>6,7</sup>, Marcela Potin<sup>13</sup>, Alvaro Rojas<sup>14</sup>,  
13 Rodrigo Fasce<sup>15</sup>, Jorge Fernández<sup>15</sup>, Judith Mora<sup>15</sup>, Eugenio Ramírez<sup>15</sup>, Aracelly Gaete-Argel<sup>16</sup>,  
14 Aarón Oyarzún-Arrau<sup>16</sup>, Fernando Valiente-Echeverría<sup>16</sup>, Ricardo Soto-Rifo<sup>16</sup>, Daniela  
15 Weiskopf<sup>17</sup>, Alessandro Sette<sup>17</sup>, Gang Zeng<sup>18</sup>, Weining Meng<sup>18</sup>, José V González-Aramundiz<sup>19</sup>,  
16 Alexis M Kalergis<sup>1,2,20\*</sup>

17

18 <sup>1</sup>Millennium Institute on Immunology and Immunotherapy.

19 <sup>2</sup>Departamento de Genética Molecular y Microbiología, Facultad de Ciencias Biológicas,  
20 Pontificia Universidad Católica de Chile, Santiago, Chile.

21 <sup>3</sup>Departamento de Enfermedades Infecciosas e Inmunología Pediátrica, División de Pediatría,  
22 Escuela de Medicina, Pontificia Universidad Católica de Chile, Santiago, Chile.

23 <sup>4</sup>Departamento de Salud Pública, Facultad de Medicina, Pontificia Universidad Católica de  
24 Chile.

25 <sup>5</sup>Complejo Asistencial Dr. Sótero del Río, Santiago, Chile.

26 <sup>6</sup>Hospital Clínico Félix Bulnes.

27 <sup>7</sup>Facultad de Medicina y Ciencia, Universidad San Sebastián, Santiago, Chile.

28 <sup>8</sup>Hospital Carlos Van Buren, V Región, Chile.

29 <sup>9</sup>Hospital Dr. Gustavo Fricke, V Región, Chile.

30 <sup>10</sup>Departamento de Pediatría, Universidad de Valparaíso.

31 <sup>11</sup>Clínica Los Andes, Universidad de Los Andes, Santiago, Chile.

32 <sup>12</sup>Facultad de Medicina, Clínica Alemana Universidad del Desarrollo, Santiago, Chile.

33 <sup>13</sup>Clínica San Carlos de Apoquindo, Red de Salud UC Christus, Santiago, Chile.

34 <sup>14</sup>Departamento de Enfermedades Infecciosas del Adulto, División de Medicina, Escuela de  
35 Medicina, Pontificia Universidad Católica de Chile, Santiago, Chile.

36 <sup>15</sup>Departamento de Laboratorio Biomédico, Instituto de Salud Pública de Chile.

37 <sup>16</sup>Laboratory of Molecular and Cellular Virology, Virology Program, Institute of Biomedical  
38 Sciences, Faculty of Medicine, Universidad de Chile, Santiago, Chile.

39 <sup>17</sup>Center for Infectious Disease and Vaccine Research, La Jolla Institute for Immunology, La  
40 Jolla, CA 92037, USA.

41 <sup>18</sup>Sinovac Biotech, Beijing, China.

42 <sup>19</sup>Departamento de Farmacia, Facultad de Química y de Farmacia. Pontificia Universidad  
43 Católica de Chile, Santiago, Chile.

44 <sup>20</sup>Departamento de Endocrinología, Facultad de Medicina, Escuela de Medicina, Pontificia  
45 Universidad Católica de Chile, Santiago, Chile.

46

47 \*Corresponding author: Alexis M Kalergis and Susan M Bueno, Pontificia Universidad Católica  
48 de Chile. Av. Libertador Bernardo O'Higgins N° 340, Santiago 8331010, Santiago, Chile. Phone  
49 56-2-6862846, e-mail addresses: [akalergis@bio.puc.cl](mailto:akalergis@bio.puc.cl), [sbueno@bio.puc.cl](mailto:sbueno@bio.puc.cl).

50 Keywords: SARS-CoV-2, CoronaVac®, phase 3 clinical trial, safety, immunogenicity, Chile.

51 **Abstract**

52 **Background:** The ongoing COVID-19 pandemic has had a significant impact worldwide, with  
53 an incommensurable social and economic burden. The rapid development of safe and  
54 protective vaccines against this disease is a global priority. CoronaVac is a vaccine prototype  
55 based on inactivated SARS-CoV-2, which has shown promising safety and immunogenicity  
56 profiles in pre-clinical studies and phase 1/2 trials in China. To this day, four phase 3 clinical  
57 trials are ongoing with CoronaVac in Brazil, Indonesia, Turkey, and Chile. This article reports  
58 the safety and immunogenicity results obtained in a subgroup of participants aged 18 years and  
59 older enrolled in the phase 3 Clinical Trial held in Chile.

60 **Methods:** This is a multicenter phase 3 clinical trial. Healthcare workers aged 18 years and  
61 older were randomly assigned to receive two doses of CoronaVac or placebo separated by two  
62 weeks (0-14). We report preliminary safety results obtained for a subset of 434 participants, and  
63 antibody and cell-mediated immunity results obtained in a subset of participants assigned to the  
64 immunogenicity arm. The primary and secondary aims of the study include the evaluation of  
65 safety parameters and immunogenicity against SARS-CoV-2 after immunization, respectively.  
66 This trial is registered at [clinicaltrials.gov](https://clinicaltrials.gov) (NCT04651790).

67 **Findings:** The recruitment of participants occurred between November 27<sup>th</sup>, 2020, until January  
68 9<sup>th</sup>, 2021. 434 participants were enrolled, 397 were 18-59 years old, and 37 were  $\geq 60$  years old.  
69 Of these, 270 were immunized with CoronaVac, and the remaining 164 participants were  
70 inoculated with the corresponding placebo. The primary adverse reaction was pain at the  
71 injection site, with a higher incidence in the vaccine arm (55.6%) than in the placebo arm  
72 (40.0%). Moreover, the incidence of pain at the injection site in the 18-59 years old group was  
73 58.4% as compared to 32.0% in the  $\geq 60$  years old group. The seroconversion rate for specific  
74 anti-S1-RBD IgG was 47.8% for the 18-59 years old group 14 days post immunization (p.i.) and  
75 95.6% 28 and 42 days p.i. For the  $\geq 60$  years old group, the seroconversion rate was 18.1%,  
76 100%, and 87.5% at 14, 28, and 42 days p.i., respectively. Importantly, we observed a 95.7%  
77 seroconversion rate in neutralizing antibodies for the 18-59 years old group 28 and 42 days p.i.

78 The  $\geq 60$  years old group exhibited seroconversion rates of 90.0% and 100% at 28 and 42 days  
79 p.i. Interestingly, we did not observe a significant seroconversion rate of anti-N-SARS-CoV-2  
80 IgG for the 18-59 years old group. For the participants  $\geq 60$  years old, a modest rate of  
81 seroconversion at 42 days p.i. was observed (37.5%). We observed a significant induction of a  
82 T cell response characterized by the secretion of IFN- $\gamma$  upon stimulation with Mega Pools of  
83 peptides derived from SARS-CoV-2 proteins. No significant differences between the two age  
84 groups were observed for cell-mediated immunity.

85 **Interpretation:** Immunization with CoronaVac in a 0-14 schedule in adults of 18 years and older  
86 in the Chilean population is safe and induces specific IgG production against the S1-RBD with  
87 neutralizing capacity, as well as the activation of T cells secreting IFN- $\gamma$ , upon recognition of  
88 SARS-CoV-2 antigens.

89 **Funding:** Ministry of Health of the Chilean Government; Confederation of Production and  
90 Commerce, Chile; Consortium of Universities for Vaccines and Therapies against COVID-19,  
91 Chile; Millennium Institute on Immunology and Immunotherapy.

## 92 Introduction

93 Severe acute respiratory syndrome coronavirus 2 (SARS-CoV-2) is the emerging  
94 pathogen responsible for coronavirus disease 2019 (COVID-19) <sup>1-3</sup>. This virus was first  
95 described in December 2019 in Wuhan, China, and it is the source of the ongoing pandemic,  
96 which has resulted by March 2021 in almost 130 million cases and over 2,7 million deaths  
97 worldwide <sup>4</sup>. Due to its novelty and impact on human health, international efforts are focused on  
98 generating vaccines to counteract COVID-19. Epidemiological studies show that individuals  
99 aged  $\geq 60$  and those with chronic conditions are more susceptible to severe disease, frequently  
100 resulting in death <sup>5,6</sup>. To date, more than 180 vaccines are under development, with over 80 of  
101 them in clinical trials, 18 undergoing phase 3 or phase 4 clinical trials, and 10 approved for  
102 emergency use <sup>7</sup>. While many different vaccine platforms are being used and explored, most of  
103 them rely on a single viral component, namely the full-length Spike (S) protein or the receptor-  
104 binding domain (RBD) of Spike<sup>7,8</sup>.

105 CoronaVac is an inactivated SARS-CoV-2 vaccine, developed by Sinovac Life Sciences  
106 Co., Ltd. (Beijing, China) <sup>9</sup>. Sinovac received approval from the NMPA in China in April 2020 to  
107 conduct phase 1/2 studies of this vaccine candidate in that country after demonstrating that it  
108 was safe and immunogenic in different animal models, such as rodents and non-human  
109 primates <sup>9</sup>. Phase 1/2 clinical trials in China were carried out as randomized, double-blind, and  
110 placebo-controlled studies. In these trials, two vaccination schedules were evaluated: two doses  
111 separated by 14 days (0-14) or 28 days (0-28) <sup>10,11</sup>. Overall, these studies reported one severe  
112 adverse event (SAE) possibly related to the vaccine during the phase 2 trial with participants  
113 aged 18-59, which resolved within three days <sup>10</sup>. There were eight SAEs in the  $\geq 60$  years old  
114 age group, but all were unrelated to the vaccine <sup>11</sup>. Both phase 2 trials showed that this vaccine  
115 induces neutralizing antibodies 14 days after the second dose <sup>10,11</sup>. The neutralizing antibody  
116 seroconversion rate was above 92% in participants aged 18-59, and above 94% for participants  
117 aged  $\geq 60$ , using two 3  $\mu\text{g}$  doses in the 0-28 schedule <sup>10,11</sup>. The results from these clinical trials

118 suggest that this vaccine is safe and likely induces a protective immune response against  
119 SARS-CoV-2.

120           Currently, four phase 3 clinical trials are evaluating the efficacy of CoronaVac, and are  
121 being carried out in Brazil, Turkey, Indonesia, and Chile. Here, we report an interim analysis of  
122 safety and immunogenicity parameters upon immunization of the Chilean population with  
123 CoronaVac or placebo in healthcare workers aged 18-59 and  $\geq 60$  in a 0-14 days vaccination  
124 schedule. A total of 434 participants were evaluated, 397 aged 18-59 and 37 aged  $\geq 60$ . Given  
125 that this vaccine carries multiple SARS-CoV-2 antigens, the characterization of the humoral and  
126 cellular immune response was extended to other components of the viral proteome beyond  
127 Spike. Taken together, this is the first report characterizing the cellular and humoral immune  
128 responses elicited by CoronaVac in a population other than the Chinese. Our results indicate  
129 that CoronaVac is safe and immunogenic in adults aged 18-59 and  $\geq 60$  in the Chilean  
130 population.

## 131 **Materials and Methods**

### 132 **Study design, randomization, and participants**

133 This clinical trial (clinicaltrials.gov NCT04651790) was conducted in Chile at eight  
134 different sites. The study protocol was conducted according to the current Tripartite Guidelines  
135 for Good Clinical Practices, the Declaration of Helsinki <sup>12</sup>, and local regulations. The trial  
136 protocol was reviewed and approved by the Institutional Scientific Ethical Committee of Health  
137 Sciences, Pontificia Universidad Católica de Chile, Approval #200708006 (Committee  
138 members: Claudia Uribe PUC/Committee president; Colomba Cofré/Committee Vice-president;  
139 Andréa Villagrán/Executive secretary; Jorge Muñoz/External Lawyer; Gustavo  
140 Kaltwasser/External member; Alysa Garay/Community representative; Marisa Torres/Public  
141 Health Department; Carolina Méndez/Speech therapy representative; Luis Villarroel/Public  
142 Health Department; Pablo Brockman/Respiratory Diseases in Children Department. Website:  
143 <http://eticayseguridad.uc.cl/comite-etico-cientifico-facultad-de-medicina-uc.html>). Trial execution  
144 was approved by the Chilean Public Health Institute (#24204/20). Written informed consent was  
145 obtained from each participant before enrollment. The study included healthcare workers who  
146 were in contact with possible or confirmed cases of COVID-19  $\geq 18$  years old. Participants were  
147 inoculated with either two doses of 3  $\mu\text{g}$  (600SU) of CoronaVac or placebo at 0- and 14-days  
148 post the first immunization (p.i.). Exclusion criteria included, among others, history of confirmed  
149 symptomatic SARS-CoV-2 infection, pregnancy, allergy to vaccine components, and  
150 immunocompromised conditions. Well-controlled medical conditions were allowed. A complete  
151 list of inclusion/exclusion criteria is provided in the study protocol.

152 Participants were randomly assigned to immunization with CoronaVac or injection with  
153 placebo in a 1:1 ratio. A subgroup of participants was assigned to the immunogenicity arm, and  
154 they received randomly either CoronaVac or placebo (3:1 ratio). The randomization process  
155 was done using a sealed enveloped system integrated into the electronic Case Report Forms  
156 (eCRF) in the OpenClinica platform. All participants, blind investigators, and laboratory staff  
157 were masked to arm allocation. A total of 434 participants were enrolled up to January 9<sup>th</sup>, 2021.

158 The immunogenicity arm includes 190 participants. Table 1 summarizes the characteristics of  
159 the participants, and Figure 1 shows the study profile.

160

## 161 **Procedures**

162 CoronaVac consists of 3  $\mu$ g of  $\beta$ -propiolactone inactivated SARS-CoV-2 (strain CZ02)  
163 with aluminum hydroxide as an adjuvant in 0.5 mL<sup>9</sup>. More details on excipients and the Placebo  
164 can be found in the Supplementary Material. A non-blind study nurse was in charge of  
165 administering intramuscularly in the deltoid area the contents of ready-to-use syringes loaded  
166 with either CoronaVac or placebo to participants. For the immunogenicity arm, blood samples  
167 were obtained at different time points and were used for the isolation of sera and PBMC. For  
168 sera samples, 20 mL of blood were collected. For PBMC isolation, 30 mL of blood were  
169 collected in heparinized tubes. Details regarding isolation of sera and PBMCs can be found in  
170 the Supplementary Material.

171 To assess the presence of anti-SARS-CoV-2 antibodies, blood samples from 39  
172 participants obtained at days 0 (baseline), 14, 28, and 42 p.i. were analyzed. The quantitative  
173 measurement of human IgG antibodies against the RBD domain of the S1 protein (S1-RBD)  
174 and against the N protein of SARS-CoV-2 was determined using the RayBio COVID-19 (SARS-  
175 CoV-2) Human Antibody Detection Kit (Indirect ELISA method) (Cat #IEQ-CoVS1RBD-IgG &  
176 #IEQ-CovN-IgG). Details on the characteristics and the methodology of these kits can be found  
177 on the Supplementary Material. The neutralizing capacities of the antibodies in the samples of  
178 the participants were evaluated through the SARS-CoV-2 surrogate virus neutralization test  
179 (sVNT) kit from Genscript (cat. number L00847-A). Assays were performed according to the  
180 instructions of the manufacturer and further details can be found on the Supplementary Material.

181 To assess the cellular immune response, ELISPOT and flow cytometry assays were  
182 performed using PBMCs from 36 participants. Stimulus included in these assays considers the  
183 use of Mega Pools (MPs) of peptides derived from SARS-CoV-2 proteins, previously described  
184 <sup>13</sup>. Two MPs composed of peptides from the S protein (MP-S) and the remaining proteins of the



185 viral particle (MP-R) were used. Also, two MPs composed of peptides from the whole proteome  
186 of SARS-CoV-2 (CD8-A and CD8-B) were used. Corresponding positives and negative controls  
187 were held. A total of  $3 \times 10^5$  cells in 50  $\mu$ L of media were added to each well containing 50  $\mu$ L of  
188 media with the corresponding stimulus. For ELISPOT assays, cells were incubated for 48h at  
189 37°C, 5% CO<sub>2</sub>. Further details regarding the ELISPOT protocol can be found in the  
190 Supplementary Materials. To characterize T cells and the production of cytokines by these  
191 populations, flow cytometry assays were performed. A total of  $3 \times 10^5$  cells per well were  
192 stimulated with the same stimulus indicated above. 24h after incubation, samples were stained  
193 to evaluate the expression of surface and intracellular markers. Further details on the antibodies  
194 used and the protocol can be found in the Supplementary Materials.

195

## 196 **Outcomes**

197 The primary aim was to evaluate the frequency of solicited and unsolicited AEs that  
198 occur during 7 days after each dose, stratified by age group (aged 18-59 and  $\geq 60$ ). Grading for  
199 solicited and unsolicited AEs can be found in detail in the Table S1, S2, and S3 of the  
200 Supplementary Materials. Secondary safety endpoints include the frequency of any other AE  
201 occurring 28 days after each dose, SAEs, and Events of Special Interest in any moment, and  
202 their relationship with the investigational vaccine. Secondary immunogenic endpoints  
203 considered, among others, the assessment of the presence of anti-SARS-CoV-2 antibodies and  
204 the cellular immune response elicited by the vaccine in a subgroup of participants, at days 0, 28,  
205 and 42 p.i.. A complete list of outcomes can be found in the study protocol.

206

## 207 **Statistical analysis**

208 To determine the sample size to use in this trial, the parameters used were a protection  
209 rate of the vaccine of ( $\mu = 0.5$ ); an incidence rate in the population group of 6%;  $\alpha = 0.05$ ;  $1 - \beta =$   
210 0.9. A total of 1,068 participants need to be recruited in each group. Considering a 10% rate of  
211 withdrawal, the sample size in each group was defined as 1,175.

212 Safety analysis considers all AEs (solicited and unsolicited) that occurred after each  
213 injection. All AEs were coded and grouped according to MedDRA (Medical Dictionary for  
214 Regulatory Activities) methodology. Solicited AEs (local and systemic) are presented in a  
215 summarized form according to frequency, their maximum intensity, and duration per participant.  
216 Rates were compared between several groups (vaccine v/s placebo; 18-59 v/s  $\geq 60$  years old;  
217 first v/s second dose) using a two-tailed Pearson's Chi-square or Fisher's exact test. Unsolicited  
218 AEs with a frequency of 1% or more; SAEs; and Events of Special Interest are presented.

219 To evaluate statistical differences in the immunogenicity data, one- or two-way non-  
220 parametric ANOVAs (Friedman test) with the corresponding *post hoc* test (Dunn's test corrected  
221 for multiple comparisons) or Wilcoxon tests or two-tailed Student's t-test (for comparisons  
222 between two groups) were performed depending on the assay. The significance level was set at  
223 0.05. All data were analyzed with GraphPad Prism 9.0.1. or SPSS 17.0.

#### 224 **Role of the funding source**

225 The funding sources of this study had no role in study design, data collection, analysis,  
226 and interpretation, or writing of the article. All the listed authors had full access to all the data in  
227 the study and agreed to submit it for publication.

## 228 Results

### 229 1. CoronaVac shows a favorable safety profile in adults aged 18-59 and $\geq 60$ in the Chilean 230 population.

231 Participants of this phase of the study were recruited between November 27<sup>th</sup>, 2020, and  
232 January 9<sup>th</sup>, 2021. 434 participants were enrolled, with 397 aged 18-59 and 37 aged 60-75. 268  
233 participants were women (61.7%), and 166 were men (38.3%). The mean age (SD) was 39.7 ( $\pm$   
234 11.8) years in the placebo arm and 40.9 ( $\pm$  11.9) in the vaccine arm. 319 participants received  
235 two doses of either CoronaVac or placebo (286 in the 18-59 age group and 33 in the  $\geq 60$  age  
236 group). The vaccination schedule for both groups was 0-14. The demographic characteristics of  
237 the participants are summarized in Table 1.

238 A list of local and systemic solicited AEs observed after each vaccine dose is shown in  
239 Table 2. The most-reported solicited local AEs was pain at the injection site, with an incidence  
240 of 55.6% in the vaccine arm as compared to 40.0% in the placebo arm (p-value = 0.015).  
241 Symptoms usually started after vaccination and were resolved within two days, with  
242 predominantly mild (grade 1) severity (98%, 91%, and 100%, respectively). Local AEs were  
243 more frequent in the vaccine arm (278 events) than in the placebo arm (78 events). Headaches  
244 were the most common solicited systemic AEs with a frequency of 48.5% in the vaccine arm  
245 and 48.8% in the placebo arm. Intensity of AEs was mostly mild or moderate. No serious  
246 adverse events (SAEs) nor Events of Special Interest were reported in either arm. Significant  
247 differences were observed between age groups regarding the frequency of local and systemic  
248 AEs (Table S4): pain was present in 47.1% of the 18-59 years old group in contrast to 29.7% in  
249 the  $\geq 60$  years old group (p-value = 0.009), while headache was present in 42.4% and 27.0%,  
250 respectively (p-value = 0.026). This association remained present in the vaccine arm but not in  
251 the placebo arm.

252 A total of 55 unsolicited AEs were reported. Those with a frequency of 1% or more were  
253 gastrointestinal discomfort (n=7), abdominal pain (n=5), odynophagia (n=5), and back pain  
254 (n=4). During the study period, three COVID-19 cases occurred (breakthrough cases). Two

255 were detected at enrolment: one of them developed anosmia in the following days, and another  
256 after the first dose. One of them had a clinical progression score of 1 (asymptomatic), and the  
257 other two had a score of 2 (symptomatic, independent)<sup>14</sup>. No SAEs nor other events of special  
258 interest occurred in this study period.

259

260 **2. Immunization with CoronaVac in a 0-14 schedule induces the secretion of IgG against**  
261 **the S1-RBD of SARS-CoV-2 with potentially neutralizing capacities in adults aged 18-59**  
262 **and ≥60.**

263 Evaluation of IgG specific against S1-RBD and the N protein of SARS-CoV-2 was  
264 performed independently using ELISA assays (Fig. S1 and S2). A total of 32 participants aged  
265 18-59 (23 in the vaccine arm and 9 in the placebo arm) and 14 participants aged ≥60 were  
266 evaluated (11 in the vaccine arm and 3 in the placebo arm). Four of the participants aged 18-59  
267 were identified as seropositive at the time of recruitment. Seroconversion rates for the S1-RBD  
268 specific IgG (Table 3 - Upper) were 47.8% 14 days p.i. in participants aged 18-59 (GMT 23.1)  
269 and 18.1% at the same time point in participants aged ≥60 (GMT 45.1). At 28 and 42 days p.i.,  
270 seroconversion rates reached 95.6% in participants aged 18-59 (GMT 1,755 and 1,878 at day  
271 28 and 42 p.i., respectively). Seroconversion rates in participants aged ≥60 reached 100% at  
272 day 28 p.i. (GMT 1,860.2) and 87.5% at day 42 p.i. (GMT 1,878) (Table 3 and Figure 2).  
273 Interestingly, the seroconversion rates for IgG specific against the N protein (Table 3 – Middle)  
274 14 days p.i. was 8.7% for participants aged 18-59 (GMT 5.3) and 0% for participants aged ≥60  
275 (GMT 5.5). On day 28 p.i., the seroconversion rates were 17.4% for the 18-59 years old group  
276 and 20.0% ≥60 years old group (GMT 8.0 and 9.6 respectively), which increased up to 37.5%  
277 for the participants ≥60 years old (GMT 32.6) and decreased to 13.0% in participants aged 18-  
278 59 (GMT 9.2) 42 days p.i. (Table 3 and Figure 2). The results obtained for the seropositive  
279 participants at enrollment and breakthrough cases are shown in Table S5. These results  
280 suggest that CoronaVac induces a significant production of S1-RBD specific IgG after  
281 immunization with a 0-14 scheme but induces a weak production of IgG specific against the N

282 protein. We confirmed that doses of CoronaVac contain significant amounts of the N protein  
283 (Fig. S3).

284 To evaluate the potential neutralizing capacities of these antibodies, a sVNT was  
285 performed. This test detects whether antibodies present in the sera interfere with the binding of  
286 S1-RBD to the hACE2 receptor. Serum samples used were obtained from 44 participants aged  
287 18-59 (23 in the vaccine arm and 8 in the placebo arm) and 14 participants aged  $\geq 60$  (10 in the  
288 vaccine arm and 3 in the placebo arm), at 0, 28, and 42 days p.i.. An inhibition rate of  $\leq 30\%$  was  
289 set as the negative cut-off for this assay. We observed that the titers of antibodies against the  
290 RBD region increased significantly 28 and 42 days p.i. as compared to day 0. The GMTs  
291 calculated for the antibody titers in participants aged 18-59 were 15.1 on day 28 p.i., and 17.5  
292 on day 42 p.i., (Fig. 3A). Regarding the  $\geq 60$  years old group, the GMTs were 39.4 and 48.5, at  
293 28 and 42 days p.i., respectively (Fig. 3B). The seroconversion rate was 96% for the 18-59 age  
294 group at 28 and 42 days p.i. and 90% and 100% for the  $\geq 60$  age group at these times. The  
295 neutralizing capacities of antibodies induced by vaccination were also evaluated by three  
296 additional methodologies (pseudotyped virus assay<sup>15</sup>, BioHermes surrogate VNT and  
297 neutralization of live SARS-CoV-2), showing similar results (Fig. S4). These results suggest that  
298 immunization with CoronaVac in a 0-14 schedule promotes the production of anti-S1-RBD IgG  
299 with neutralizing capacities in both age groups.

300

### 301 **3. Immunization with CoronaVac in a 0-14 schedule induces IFN- $\gamma$ -producing T cells** 302 **specific for SARS-CoV-2 antigens in adults aged 18-59 and $\geq 60$ in the Chilean population.**

303 To evaluate the cellular immune response elicited upon vaccination with CoronaVac, the  
304 specific T cell responses against MP of peptides derived from the S protein of SARS-CoV-2  
305 (MP-S) and the remaining proteins of this virus (MP-R) were evaluated by ELISPOT and flow  
306 cytometry assays in a total of 36 participants from the vaccine arm (27 aged 18-59 and 9 aged  
307  $\geq 60$ ) and 6 from the placebo arm. We observed an increase in the number of Spot Forming  
308 Cells (SFCs) for IFN- $\gamma$  at 28 and 42 days p.i. as compared to day 0, upon stimulation with both

309 the MP-S and the MP-R (Fig. 4A and B). This tendency was seen for participants aged 18-59  
310 and  $\geq 60$  (Fig. 4). Similar trends were observed when a fold change analysis of this increase was  
311 performed and normalized to day 0 (Fig. S5). In the 18-59 age group, the number of SFCs for  
312 IFN- $\gamma$  producing T cells showed an average increase of 14.04 and 9.76 times for the MP-S and  
313 31.78 and 18.67 times for the MP-R at 28 and 42 days p.i., respectively. In the  $\geq 60$  years old  
314 group, an average increase of 20.04 and 9.63 times was observed for the MP-S, and 33.81 and  
315 20.28 times for the MP-R at 28 and 42 days p.i., respectively. Participants in the placebo arm  
316 exhibited no differences in the number of SFCs for IFN- $\gamma$  among the different stimuli and time  
317 points evaluated (Fig. S6). The response detected in the ELISPOT assays suggests that  
318 immunization with CoronaVac induces a T cell response polarized towards a Th1 immune  
319 profile, as the secretion of IL-4 by T cells was mainly undetected (Fig. S7). As a positive control,  
320 PBMCs from participants were stimulated with an MP of peptides derived from cytomegalovirus  
321 (CMV) (Fig. S8).

322         Since MP-S and MP-R were originally determined *in silico* to optimally stimulate CD4<sup>+</sup> T  
323 cells, the activation and the secretion of Th1 cytokines by these cells upon stimulation were  
324 evaluated by flow cytometry. Remarkably, the absolute numbers of activated CD4<sup>+</sup> T cells  
325 (defined as CD3<sup>+</sup>, CD4<sup>+</sup>, CD69<sup>+</sup>) increased at 28 days p.i. as compared to day 0 in both age  
326 groups (Fig. S9A and Table S6). The absolute number of the activated CD4<sup>+</sup> T cells secreting  
327 IFN- $\gamma$  showed an evident increase at 28 days p.i. in the 18-59 years old group, upon stimulation  
328 with both MP-S and MP-R (Fig. 4C and D). However, this trend was not evident for the  $\geq 60$   
329 years old group, primarily upon stimulation with the MP-S. A fold change analysis of the  
330 activated CD4<sup>+</sup> T cells secreting IFN- $\gamma$  at days 28 and 42 p.i., compared to day 0, also suggests  
331 that an increase is observed for the 18-59 years old group, but not for the  $\geq 60$  years old group  
332 (Table S6). We also evaluated the absolute numbers (Fig. S10) and the fold change (Table S6)  
333 of activated CD4<sup>+</sup> T cells producing IL-2 or TNF- $\alpha$  upon stimulation with MP-S and MP-R,  
334 evidencing variable trends among both age groups, 28 and 42 days p.i., compared to day 0.

335           The specific T cell responses against MP of peptides chosen from the whole proteome  
336 of SARS-CoV-2 (MP-CD8A and MP-CD8B) was also evaluated in 7 participants aged 18-59 and  
337 7 participants aged  $\geq 60$ . In most of the participants evaluated for the 18-59 age group,  
338 stimulation with MP-CD8A and CD8B resulted in a modest increase in SFCs for IFN- $\gamma$  28 and 42  
339 days p.i. compared to day 0 (Fig. 5A and B). However, a partial rise in SFCs producing IFN- $\gamma$   
340 was observed upon stimulation with both MP-CD8A and MP-CD8B for some participants aged  
341  $\geq 60$  (Fig. 5B), at 28 and 42 days p.i.. There was a subtle fold increase in the number of SFCs  
342 positive for IFN- $\gamma$  in participants aged 18-59 and a more evident fold increase in participants  
343 aged  $\geq 60$  with both MP, at 28 and 42 days p.i. (Fig. S11). No marked differences were detected  
344 for the placebo arm participants among the different stimuli and times evaluated (Fig. S12).

345           Since the peptides included in MP-CD8A and MP-CD8B were determined *in silico* to  
346 stimulate CD8<sup>+</sup> T cells, the activation and the secretion of Th1 cytokines by these cells upon  
347 stimulation was measured by flow cytometry, as described in <sup>13</sup>. Variable changes were seen in  
348 the activation of CD8<sup>+</sup> T cells (defined as CD3<sup>+</sup>, CD8<sup>+</sup>, CD69<sup>+</sup>), and the secretion of cytokines  
349 by these cells. For both groups, the absolute number of activated CD8<sup>+</sup> T cells showed no  
350 significant variation at 28 and 42 days p.i. compared to day 0 (Fig. S13). Minor increases at 28  
351 days p.i. were observed for the absolute numbers of CD8<sup>+</sup> T cells that produced the cytokines  
352 IFN- $\gamma$  in both age groups (Fig. 5C and D). Fold change analysis of these results can be found on  
353 Table S6. We also evaluated absolute numbers (Fig. S14) and fold increases (Table S6) of  
354 activated CD8<sup>+</sup> T cells producing IL-2 or TNF- $\alpha$  upon stimulation with MP-CD8A and MP-CD8B.  
355 Variable trends for these cells at 28 and 42 days p.i. for both groups were detected, as  
356 compared to day 0. Although a higher number of participants must be evaluated, ELISPOT and  
357 flow cytometry results suggest that stimulation with MP-CD8A and MP-CD8B can, to some  
358 extent, induce a cellular immune response in participants immunized with CoronaVac.

359           Overall, these results suggest that CoronaVac can induce a humoral immune response  
360 based on total and neutralizing antibodies and a CD4<sup>+</sup> T cell response polarized towards a Th1  
361 profile in adults aged 18 and older, which targets several SARS-CoV-2 antigens.

## 362 Discussion

363 This study is a first preliminary analysis of a phase 3 clinical trial performed in Chile with  
364 CoronaVac, an inactivated vaccine against SARS-CoV-2. Results show that this vaccine has a  
365 favorable safety and immunogenicity profile in the Chilean population. Although further analyses  
366 including more participants are needed, the results shown here are similar to those obtained in  
367 previous clinical trials with CoronaVac<sup>10,11</sup>. We found that two doses of CoronaVac, in a 0-14  
368 schedule, were safe and capable of inducing a humoral and cellular immune response in both  
369 age groups evaluated (18-59 and  $\geq 60$  years old). A different immunization schedule considering  
370 a booster at day 28 p.i. instead of day 14 p.i. is being currently tested, in line with results  
371 recently reported on the Chinese population<sup>10</sup>. Further studies will focus on this new  
372 immunization schedule.

373 Adverse reactions observed were primarily mild and local, which coincides with previous  
374 reports with this vaccine. The most reported solicited local AE was pain at the injection site in  
375 the vaccine arm resolved within two days after vaccination. Headache was the most systemic  
376 common solicited AE registered in the vaccine and the placebo arm, at a similar frequency. No  
377 SAEs were reported for either the vaccine or placebo arm. Interestingly, we detected differences  
378 between the age groups regarding the frequency of local and systemic AEs. These were more  
379 frequent in the 18-59 years old group than in the  $\geq 60$  years old group.

380 The antibody response elicited by the Chilean population was similar to the one reported  
381 previously. We detected over 90% seroconversion for S1-RBD-specific IgG, along with over  
382 90% of seroconversion for neutralizing antibodies at 28 and 42 days p.i.. These rates are  
383 consistent with the data reported in the phase 2 trial conducted in China (100% for RBD-specific  
384 IgG and 99.2% for neutralizing antibodies) for the same immunization scheme, dose, and age  
385 <sup>10</sup>. Although seroconversion rates are slightly lower in participants aged  $\geq 60$  at 42 days p.i.,  
386 these results are promising, as the vaccine may exhibit a protective profile in older populations.  
387 Differences in the seroconversion rates and antibodies neutralizing capacities seen among the



388 different methodologies tested may be directly related with the intrinsic characteristics of each  
389 methodology (i.e. sVNA, pseudotype virus neutralization assays, and infection inhibition).

390 We observed a low secretion of anti-N antibodies as compared to IgG induced against  
391 the S1-RBD, which is not related to the absence of the N protein in CoronaVac. Previous  
392 reports indicate that humans naturally infected with SARS-CoV-2 develop antibody responses  
393 mainly to the S and N proteins, in somewhat similar levels<sup>9</sup>. However, immunization studies of  
394 mice, rats, and non-human primates with CoronaVac showed that the antibodies induced were  
395 mostly directed against the S protein and the S1-RBD, with a reduced amount of antibodies  
396 against the N protein<sup>9</sup>. This is in line with our findings, suggesting that the enhanced secretion  
397 of antibodies against the S protein by CoronaVac, rather than against the N protein, may be  
398 playing a role in the protective response induced by the vaccine. This may also have significant  
399 considerations when choosing techniques for the confirmation of infections with SARS-CoV-2,  
400 as anti-N antibodies may not be mostly detected in immunized individuals.

401 This is the first time a characterization of the cellular response against proteins other  
402 than the S protein of SARS-CoV-2 is reported in humans immunized with CoronaVac. Unlike  
403 previous studies<sup>10</sup>, we detected a robust T cell response upon stimulation of PBMCs with MPs  
404 of peptides from S (MP-S) and the remaining viral particle (MP-R). There was a clear increase  
405 in the number of SFCs for IFN- $\gamma$  when PBMC from days 28 and 42 p.i. were stimulated with MP-  
406 S and MP-R, which was also evident in the fold changes calculated compared to day 0. An  
407 increase in the number of activated CD4<sup>+</sup> T cells secreting IFN- $\gamma$  upon stimulation with these  
408 stimuli in those time points was detected. However, a reduced number was observed in the  $\geq 60$   
409 years old group stimulated with MP-S. This observation could be explained by a natural  
410 reduction of activated CD4<sup>+</sup> T cells in the older population, previously described for other  
411 vaccines<sup>16</sup>. We also evaluated the response elicited upon stimulation with two MPs of peptides  
412 designed to stimulate a CD8<sup>+</sup> T cell response (MP-CD8A and MP-CD8B). Stimulation with MP-  
413 CD8 (A and B) resulted in increased SFCs for IFN- $\gamma$  in some participants in the 18-59 years old  
414 group and the  $\geq 60$  years old group. We did not observe an evident increase in the number of

415 activated CD8<sup>+</sup> T cells secreting IFN- $\gamma$  at days 28 and 42 p.i. in none of the age groups.  
416 Although more participants will be evaluated to raise more robust conclusions, the results  
417 obtained so far suggest that the CD8<sup>+</sup> immune response detected in vaccinated participants is  
418 not as robust as the CD4<sup>+</sup> immune response. Since the secretion of IFN- $\gamma$  by CD4<sup>+</sup> T cells and  
419 reduced amounts of IL-4 secreting cells are in line with a well-balanced immune response that  
420 could achieve virus clearance, immunization with CoronaVac shows promising capacities of  
421 inducing an antiviral response in the host. This IFN- $\gamma$  response has also been sought and  
422 observed in other vaccines against SARS-CoV-2, such as BNT162b1 designed by BioNTech <sup>17</sup>  
423 and a recombinant adenovirus type-5 vectored COVID-19 vaccine designed by CanSino <sup>18</sup>.

424 In summary, immunization with CoronaVac is safe and induces robust humoral and  
425 cellular responses, characterized by increased antibody titers against the S1-RBD with  
426 neutralizing capacities, and the production of T cells that are specific for several SARS-CoV-2  
427 antigens and were characterized by the secretion of Th1 cytokines.

428           **Acknowledgments**

429           This study was supported by the Ministry of Health, Government of Chile; The  
430 Confederation of Production and Commerce, Chile; the Consortium of Universities for Vaccines  
431 and Therapies against COVID-19, Chile; the Chilean Public Health Institute (ISP); and the  
432 Millennium Institute on Immunology and Immunotherapy. NIH contracts 75N93019C00001(A.S)  
433 and 75N9301900065 supported A.S, D.W. We would like to thank the support of the Ministry of  
434 Science, Technology, Knowledge, and Innovation, Government of Chile; and The Ministry of  
435 Foreign Affairs, Government of Chile. We also would like to thank PATH for sharing the First  
436 WHO International Standard for anti-SARS-CoV-2 immunoglobulin; Alex Cabrera and Sergio  
437 Bustos from the Flow Cytometry Facility at Facultad de Ciencias Biológicas, Pontificia  
438 Universidad Católica de Chile for support with flow cytometry; and Sebastián Silva from the  
439 same Faculty for support with statistical analyses. We also thank the Vice Presidency of  
440 Research (VRI), the Direction of Technology Transfer and Development (DTD), the Legal Affairs  
441 Department (DAJ) and the Administrative Direction from the School of Biological Sciences and  
442 the School of Medicine of the Pontificia Universidad Católica de Chile. Special thanks to the  
443 members of the CoronaVac03CL Study Team (list in Supplementary Appendix) for their hard  
444 work and dedication to the clinical study; the members of the independent data safety  
445 monitoring committee (members in Supplementary Appendix) for their oversight, and the  
446 subjects enrolled in the study for their participation and commitment to this trial.

447           **Declaration of interest**

448           A.S. is a consultant for Gritstone, Flow Pharma, Merck, Epitogenesis, Gilead and Avalia.  
449 LJI has filed for patent protection for various aspects of T cell epitope and vaccine design work.  
450 All other authors declare no conflict of interest.

451 **References**

- 452 1 Zhu N, Zhang D, Wang W, *et al.* A Novel Coronavirus from Patients with Pneumonia in  
453 China, 2019. *N Engl J Med* 2020; **382**: 727–33.
- 454 2 Kim D, Lee J-Y, Yang J-S, Kim JW, Kim VN, Chang H. The Architecture of SARS-CoV-2  
455 Transcriptome. *Cell* 2020; **181**: 914–921.e10.
- 456 3 Zhou P, Yang X-L, Wang X-G, *et al.* A pneumonia outbreak associated with a new  
457 coronavirus of probable bat origin. *Nature* 2020; **579**: 270–3.
- 458 4 Dong E, Du H, Gardner L. An interactive web-based dashboard to track COVID-19 in real  
459 time. *Lancet Infect Dis* 2020; **20**: 533–4.
- 460 5 Perez-Saez J, Lauer SA, Kaiser L, *et al.* Serology-informed estimates of SARS-CoV-2  
461 infection fatality risk in Geneva, Switzerland. *Lancet Infect Dis* 2020; published online July  
462 14. DOI:10.1016/S1473-3099(20)30584-3.
- 463 6 O'Driscoll M, Ribeiro Dos Santos G, Wang L, *et al.* Age-specific mortality and immunity  
464 patterns of SARS-CoV-2. *Nature* 2021; **590**: 140–5.
- 465 7 WHO Covid-19. Draft landscape of COVID-19 candidate vaccines. 2020  
466 [https://www.who.int/publications/m/item/draft-landscape-of-covid-19-candidate-](https://www.who.int/publications/m/item/draft-landscape-of-covid-19-candidate-vaccines%0Ahttps://www.who.int/publications/m/item/draft-landscape-of-covid-19-candidate-vaccines%0D)  
467 [vaccines%0Ahttps://www.who.int/publications/m/item/draft-landscape-of-covid-19-](https://www.who.int/publications/m/item/draft-landscape-of-covid-19-candidate-vaccines%0Ahttps://www.who.int/publications/m/item/draft-landscape-of-covid-19-candidate-vaccines%0D)  
468 [candidate-vaccines%0D](https://www.who.int/publications/m/item/draft-landscape-of-covid-19-candidate-vaccines%0Ahttps://www.who.int/publications/m/item/draft-landscape-of-covid-19-candidate-vaccines%0D).
- 469 8 Krammer F. SARS-CoV-2 vaccines in development. *Nature* 2020; **586**: 516–27.
- 470 9 Gao Q, Bao L, Mao H, *et al.* Development of an inactivated vaccine candidate for SARS-  
471 CoV-2. *Science* 2020; **369**: 77–81.
- 472 10 Zhang Y, Zeng G, Pan H, *et al.* Safety, tolerability, and immunogenicity of an inactivated  
473 SARS-CoV-2 vaccine in healthy adults aged 18-59 years: a randomised, double-blind,  
474 placebo-controlled, phase 1/2 clinical trial. *Lancet Infect Dis* 2021; **21**: 181–92.
- 475 11 Wu Z, Hu Y, Xu M, *et al.* Safety, tolerability, and immunogenicity of an inactivated SARS-  
476 CoV-2 vaccine (CoronaVac) in healthy adults aged 60 years and older: a randomised,  
477 double-blind, placebo-controlled, phase 1/2 clinical trial. *Lancet Infect Dis* 2021; published

- 478 online Feb 3. DOI:10.1016/S1473-3099(20)30987-7.
- 479 12 World Medical Association. World Medical Association Declaration of Helsinki: ethical  
480 principles for medical research involving human subjects. *JAMA* 2013; **310**: 2191–4.
- 481 13 Grifoni A, Weiskopf D, Ramirez SI, *et al.* Targets of T Cell Responses to SARS-CoV-2  
482 Coronavirus in Humans with COVID-19 Disease and Unexposed Individuals. *Cell* 2020;  
483 **181**: 1489–1501.e15.
- 484 14 WHO Working Group on the Clinical Characterisation and Management of COVID-19  
485 infection. A minimal common outcome measure set for COVID-19 clinical research.  
486 *Lancet Infect Dis* 2020; **20**: e192–7.
- 487 15 Beltrán-Pavez C, Riquelme-Barrios S, Oyarzún-Arrau A, *et al.* Insights into neutralizing  
488 antibody responses in individuals exposed to SARS-CoV-2 in Chile. *Sci Adv* 2021; **7**:  
489 eabe6855.
- 490 16 Kang I, Hong MS, Nolasco H, *et al.* Age-associated change in the frequency of memory  
491 CD4+ T cells impairs long term CD4+ T cell responses to influenza vaccine. *J Immunol*  
492 2004; **173**: 673–81.
- 493 17 Sahin U, Muik A, Derhovanessian E, *et al.* COVID-19 vaccine BNT162b1 elicits human  
494 antibody and TH1 T cell responses. *Nature* 2020; **586**: 594–9.
- 495 18 Zhu F-C, Li Y-H, Guan X-H, *et al.* Safety, tolerability, and immunogenicity of a  
496 recombinant adenovirus type-5 vectored COVID-19 vaccine: a dose-escalation, open-  
497 label, non-randomised, first-in-human trial. *Lancet (London, England)* 2020; **395**: 1845–  
498 54.
- 499

## 500 Tables and Figures

**Table 1. Characteristics of the Participants at Baseline**

| Characteristic      | 18-59 years old<br>(n = 397) | ≥ 60 years old<br>(n = 37) | Total<br>(n = 434) | p-value |
|---------------------|------------------------------|----------------------------|--------------------|---------|
| <b>Age mean, SD</b> | 38.2 ± 9.7                   | 64.0 ± 4.3                 | 40.4 ± 11.8        |         |
| <b>Inoculation</b>  |                              |                            |                    |         |
| Vaccine; n (%)      | 245 (61.7)                   | 25 (67.6)                  | 270 (62.2)         | 0.482   |
| Placebo; n (%)      | 152 (38.3)                   | 12 (32.4)                  | 164 (37.8)         |         |
| <b>Sex</b>          |                              |                            |                    |         |
| Women; n (%)        | 251 (63.2)                   | 17 (45.9)                  | 268 (61.8)         | 0.039   |
| Men; n (%)          | 146 (36.8)                   | 20 (54.1)                  | 166 (38.2)         |         |
| <b>Ethnicity</b>    |                              |                            |                    |         |
| White; n (%)        | 370 (93.2)                   | 37 (100.0)                 | 407 (93.8)         | 0.152   |
| Other; n (%)        | 27 (6.8)                     | 0 (0.0)                    | 27 (6.2)           |         |

P-values are for comparison between total numbers in each characteristic.

501

**Table 2. Solicited Local and Systemic Adverse Events after inoculation in Participants, classified by arm and age group**

| Adverse Reaction          | First dose<br>(n =434) |                    |         | Second dose<br>(n =319) |                    |         | Both Doses<br>(n =319) |                    |         |
|---------------------------|------------------------|--------------------|---------|-------------------------|--------------------|---------|------------------------|--------------------|---------|
|                           | Placebo<br>(n=164)     | Vaccine<br>(n=270) | p-value | Placebo<br>(n=80)       | Vaccine<br>(n=239) | p-value | Placebo<br>(n=80)      | Vaccine<br>(n=239) | p-value |
| <b>Local reactions</b>    |                        |                    |         |                         |                    |         |                        |                    |         |
| Pain; n (%)               | 39 (23.8)              | 117 (43.3)         | <0.001  | 16 (20.0)               | 73 (30.5)          | 0.069   | 32 (40.0)              | 133 (55.6)         | 0.015   |
| <60 years                 | 37 (24.3)              | 113 (46.1)         | <0.001  | 15 (20.8)               | 68 (31.8)          | 0.077   | 30 (41.7)              | 125 (58.4)         | 0.014   |
| ≥60 years                 | 2 (16.7)               | 4 (16.0)           | 0.999   | 1 (12.5)                | 5 (20.0)           | 0.999   | 2 (25.0)               | 8 (32.0)           | 0.999   |
| Induration (%)            | 1 (0.6)                | 8 (3.0)            | 0.163   | 0 (0.0)                 | 15 (6.3)           | 0.015   | 0 (0.0)                | 21 (8.8)           | 0.006   |
| <60 years                 | 1 (0.7)                | 7 (2.9)            | 0.161   | 0 (0.0)                 | 13 (6.1)           | 0.043   | 0 (0.0)                | 18 (8.4)           | 0.009   |
| ≥60 years                 | 0 (0.0)                | 1 (4.0)            | 0.999   | 0 (0.0)                 | 2 (8.0)            | 0.999   | 0 (0.0)                | 3 (12.0)           | 0.56    |
| Pruritus (%)              | 4 (2.4)                | 15 (5.6)           | 0.124   | 2 (2.5)                 | 6 (2.5)            | 0.099   | 3 (3.8)                | 17 (7.1)           | 0.283   |
| <60 years                 | 4 (2.6)                | 15 (6.1)           | 0.113   | 2 (2.8)                 | 6 (2.8)            | 0.099   | 3 (4.2)                | 17 (7.9)           | 0.277   |
| ≥60 years                 | 0 (0.0)                | 0 (0.0)            | ---     | 0 (0.0)                 | 0 (0.0)            | ---     | 0 (0.0)                | 0 (0.0)            | ---     |
| Erythema (%)              | 3 (1.8)                | 10 (3.7)           | 0.386   | 2 (2.5)                 | 3 (1.3)            | 0.602   | 2 (2.5)                | 10 (4.2)           | 0.737   |
| <60 years                 | 3 (2.0)                | 10 (4.1)           | 0.385   | 1 (1.4)                 | 3 (1.4)            | 0.999   | 1 (1.4)                | 10 (4.7)           | 0.301   |
| ≥60 years                 | 0 (0.0)                | 0 (0.0)            | ---     | 1 (12.5)                | 0 (0.0)            | 0.242   | 1 (12.5)               | 0 (0.0)            | 0.242   |
| Swelling (%)              | 3 (1.8)                | 5 (1.9)            | 0.999   | 1 (1.3)                 | 5 (2.1)            | 0.999   | 1 (1.3)                | 9 (3.8)            | 0.461   |
| <60 years                 | 3 (2.0)                | 5 (2.0)            | 0.999   | 1 (1.4)                 | 4 (1.9)            | 0.999   | 1 (1.4)                | 8 (3.7)            | 0.458   |
| ≥60 years                 | 0 (0.0)                | 0 (0.0)            | ---     | 0 (0.0)                 | 1 (4.0)            | 0.999   | 0 (0.0)                | 1 (4.0)            | 0.999   |
| <b>Systemic reactions</b> |                        |                    |         |                         |                    |         |                        |                    |         |
| Headache (%)              | 50 (30.5)              | 107 (39.6)         | 0.055   | 15 (18.8)               | 46 (19.2)          | 0.922   | 39 (48.8)              | 116 (48.5)         | 0.974   |
| <60 years                 | 49 (32.2)              | 102 (41.6)         | 0.061   | 12 (16.7)               | 42 (19.6)          | 0.579   | 36 (50.0)              | 109 (50.9)         | 0.891   |
| ≥60 years                 | 1 (8.3)                | 5 (20.0)           | 0.641   | 3 (37.5)                | 4 (16.0)           | 0.32    | 3 (37.5)               | 7 (28.0)           | 0.673   |
| Fatigue (%)               | 32 (19.5)              | 58 (21.5)          | 0.624   | 10 (12.5)               | 25 (10.5)          | 0.613   | 22 (27.5)              | 64 (26.8)          | 0.9     |
| <60 years                 | 31 (20.4)              | 55 (22.4)          | 0.629   | 8 (11.1)                | 23 (10.7)          | 0.932   | 20 (27.8)              | 60 (28.0)          | 0.966   |
| ≥60 years                 | 1 (8.3)                | 3 (12.0)           | 0.999   | 2 (25.0)                | 2 (8.0)            | 0.241   | 2 (25.0)               | 4 (16.0)           | 0.616   |
| Myalgia (%)               | 23 (14.0)              | 48 (17.8)          | 0.305   | 9 (11.3)                | 19 (7.9)           | 0.367   | 19 (23.8)              | 54 (22.6)          | 0.831   |
| <60 years                 | 22 (14.5)              | 46 (18.8)          | 0.269   | 8 (11.1)                | 16 (7.5)           | 0.336   | 18 (25.0)              | 50 (23.4)          | 0.778   |
| ≥60 years                 | 1 (8.3)                | 2 (8.0)            | 0.999   | 1 (12.5)                | 3 (12.0)           | 0.999   | 1 (12.5)               | 4 (16.0)           | 0.999   |
| Diarrhea (%)              | 18 (11.0)              | 36 (13.3)          | 0.471   | 5 (6.3)                 | 18 (7.5)           | 0.701   | 15 (18.8)              | 44 (18.4)          | 0.946   |
| <60 years                 | 17 (11.2)              | 36 (14.7)          | 0.318   | 4 (5.6)                 | 16 (7.5)           | 0.58    | 14 (19.4)              | 42 (19.6)          | 0.973   |

|                     |           |          |       |          |         |       |           |           |       |
|---------------------|-----------|----------|-------|----------|---------|-------|-----------|-----------|-------|
| ≥60 years           | 1 (8.3)   | 0 (0.0)  | 0.324 | 1 (12.5) | 2 (8.0) | 0.999 | 1 (12.5)  | 2 (8.0)   | 0.999 |
| Nausea (%)          | 18 (11.0) | 25 (9.3) | 0.562 | 3 (3.8)  | 9 (3.8) | 0.999 | 11 (13.8) | 27 (11.3) | 0.558 |
| <60 years           | 18 (11.8) | 22 (9.0) | 0.357 | 2 (2.8)  | 9 (4.2) | 0.736 | 10 (13.9) | 24 (11.2) | 0.544 |
| ≥60 years           | 0 (0.0)   | 3 (12.0) | 0.537 | 1 (12.5) | 0 (0.0) | 0.242 | 1 (12.5)  | 3 (12.0)  | 0.999 |
| Arthralgia (%)      | 10 (6.1)  | 14 (5.2) | 0.687 | 2 (2.5)  | 7 (2.9) | 0.999 | 7 (8.8)   | 18 (7.5)  | 0.726 |
| <60 years           | 10 (6.6)  | 13 (5.3) | 0.596 | 2 (2.8)  | 6 (2.8) | 0.999 | 7 (9.7)   | 16 (7.5)  | 0.544 |
| ≥60 years           | 0 (0.0)   | 1 (4.0)  | 0.999 | 0 (0.0)  | 1 (4.0) | 0.999 | 0 (0.0)   | 2 (8.0)   | 0.999 |
| Anorexia (%)        | 10 (6.1)  | 18 (6.7) | 0.815 | 3 (3.8)  | 3 (1.3) | 0.169 | 6 (7.5)   | 16 (6.7)  | 0.806 |
| <60 years           | 10 (6.6)  | 16 (6.5) | 0.985 | 2 (2.8)  | 3 (1.4) | 0.603 | 5 (6.9)   | 14 (6.5)  | 0.999 |
| ≥60 years           | 0 (0.0)   | 2 (8.0)  | 0.999 | 1 (12.5) | 0 (0.0) | 0.242 | 1 (12.5)  | 2 (8.0)   | 0.999 |
| Pruritus (%)        | 2 (1.2)   | 10 (3.7) | 0.225 | 0 (0.0)  | 4 (1.7) | 0.575 | 1 (1.3)   | 14 (5.9)  | 0.127 |
| <60 years           | 2 (1.3)   | 9 (3.7)  | 0.217 | 0 (0.0)  | 4 (1.9) | 0.575 | 1 (1.4)   | 13 (6.1)  | 0.202 |
| ≥60 years           | 0 (0.0)   | 1 (4.0)  | 0.999 | 0 (0.0)  | 0 (0.0) | ---   | 0 (0.0)   | 1 (4.0)   | 0.999 |
| Exanthema (%)       | 1 (0.6)   | 7 (2.6)  | 0.268 | 0 (0.0)  | 1 (0.4) | 0.999 | 1 (1.3)   | 8 (3.3)   | 0.459 |
| <60 years           | 1 (0.7)   | 7 (2.9)  | 0.161 | 0 (0.0)  | 1 (0.5) | 0.999 | 1 (1.4)   | 8 (3.7)   | 0.458 |
| ≥60 years           | 0 (0.0)   | 0 (0.0)  | ---   | 0 (0.0)  | 0 (0.0) | ---   | 0 (0.0)   | 0 (0.0)   | ---   |
| Allergy (%)         | 1 (0.6)   | 6 (2.2)  | 0.262 | 0 (0.0)  | 3 (1.3) | 0.575 | 0 (0.0)   | 8 (3.3)   | 0.209 |
| <60 years           | 0 (0.0)   | 5 (2.0)  | 0.161 | 0 (0.0)  | 2 (0.9) | 0.999 | 0 (0.0)   | 4 (1.9)   | 0.575 |
| ≥60 years           | 1 (8.3)   | 1 (4.0)  | 0.999 | 0 (0.0)  | 1 (4.0) | 0.999 | 0 (0.0)   | 1 (4.0)   | 0.999 |
| Vomiting (%)        | 3 (1.8)   | 1 (0.4)  | 0.154 | 0 (0.0)  | 4 (1.7) | 0.575 | 0 (0.0)   | 4 (1.7)   | 0.575 |
| <60 years           | 3 (2.0)   | 1 (0.4)  | 0.159 | 0 (0.0)  | 4 (1.9) | 0.575 | 0 (0.0)   | 4 (1.9)   | 0.575 |
| ≥60 years           | 0 (0.0)   | 0 (0.0)  | ---   | 0 (0.0)  | 0 (0.0) | ---   | 0 (0.0)   | 0 (0.0)   | ---   |
| Fever (>37.8°C) (%) | 1 (0.6)   | 1 (0.4)  | 0.999 | 0 (0.0)  | 0 (0.0) | ---   | 1 (1.3)   | 1 (0.4)   | 0.439 |
| <60 years           | 1 (0.7)   | 1 (0.4)  | 0.999 | 0 (0.0)  | 0 (0.0) | ---   | 1 (1.4)   | 1 (0.5)   | 0.441 |
| ≥60 years           | 0 (0.0)   | 0 (0.0)  | ---   | 0 (0.0)  | 0 (0.0) | ---   | 0 (0.0)   | 0 (0.0)   | ---   |

Percentages were calculated from the total number of participants in each group.

Data in the table were reported within 7 days post any of the two doses.

Sample sizes: Placebo <60 1<sup>st</sup> dose: n=152; Placebo <60 2<sup>nd</sup> dose: n=72; Vaccine <60 1<sup>st</sup> dose: n=245; Vaccine <60 2<sup>nd</sup> dose: n=214; Placebo ≥ 60 1<sup>st</sup> dose: n=12 ; Placebo ≥60 2<sup>nd</sup> dose: n=8 ; Vaccine ≥60 1<sup>st</sup> dose: n=25; Vaccine ≥60 years 2<sup>nd</sup> dose: n=25.



**Table 3. Seroconversion rates and Geometric median titer of antibodies against SARS-CoV-2 proteins**

| <b>Antibodies detected</b>      | <b>Group</b>     | <b>Indicators</b>  | <b>Day 14</b>      | <b>Day 28</b>         | <b>Day 42</b>        |
|---------------------------------|------------------|--------------------|--------------------|-----------------------|----------------------|
| <b>Anti-S1-RBD IgG</b>          | Total<br>Vaccine | Seroconversion n/N | 13/34              | 32/33                 | 29/31                |
|                                 |                  | (%)                | (38.2)             | (96.9)                | (93.5)               |
|                                 |                  | GMT<br>(95%CI)     | 21.9<br>(6.7-71.7) | 2015.9<br>(1382-2940) | 1686.6<br>(948-3001) |
|                                 | 18-59 years      | Seroconversion n/N | 11/23              | 22/23                 | 22/23                |
|                                 |                  | (%)                | (47.8)             | (95.6)                | (95.6)               |
|                                 |                  | GMT<br>(95%CI)     | 45.1<br>(10-203.2) | 1860.2<br>(1174-2948) | 2036.2<br>(477-2807) |
|                                 | ≥ 60 years       | Seroconversion n/N | 2/11               | 10/10                 | 7/8                  |
|                                 |                  | (%)                | (18.1)             | (100)                 | (87.5)               |
|                                 |                  | GMT<br>(95%CI)     | 4.81<br>(0.7-31.6) | 2425.2<br>(1109-5302) | 981.2<br>(87-11064)  |
|                                 | Placebo          | Seroconversion n/N | 1/12               | 1/10                  | 0/0                  |
|                                 |                  | (%)                | (8.3)              | (10)                  | N/D                  |
|                                 |                  | GMT<br>(95%CI)     | 2.4<br>(0.6-9.1)   | 3.1<br>(0.6-9.4)      | N/D<br>N/D           |
| <b>Anti-N IgG</b>               | Total<br>Vaccine | Seroconversion n/N | 2/34               | 6/33                  | 6/31                 |
|                                 |                  | (%)                | (5.9)              | (18.2)                | (19.4)               |
|                                 |                  | GMT<br>(95%CI)     | 5.4<br>(2.1-13.7)  | 8.5<br>(2.98-24)      | 12.8<br>(4.4-37.7)   |
|                                 | 18-59 years      | Seroconversion n/N | 2/23               | 4/23                  | 3/23                 |
|                                 |                  | (%)                | (8.7)              | (17.4)                | (13.0)               |
|                                 |                  | GMT<br>(95%CI)     | 5.3<br>(1.7-17)    | 8.0<br>(2.2-29.2)     | 9.2<br>(2.6-32.7)    |
|                                 | ≥ 60 years       | Seroconversion n/N | 0/11               | 2/10                  | 3/8                  |
|                                 |                  | (%)                | (0)                | (20.0)                | (37.5)               |
|                                 |                  | GMT<br>(95%CI)     | 5.5<br>(0.7-38.6)  | 9.6<br>(1.1-81.5)     | 32.6<br>(2.7-398.4)  |
|                                 | Placebo          | Seroconversion n/N | 1/12               | 0/10                  | 0/0                  |
|                                 |                  | (%)                | (8.3)              | (0)                   | (-)                  |
|                                 |                  | GMT<br>(95%CI)     | 5.8<br>(1-33.34)   | 3.1<br>(0.5-17.6)     | N/D<br>(-)           |
| <b>Neutralizing anti-S1-RBD</b> | Total<br>Vaccine | Seroconversion n/N | N/D                | 31/33                 | 32/33                |
|                                 |                  | (%)                | (-)                | (94)                  | (97)                 |
|                                 |                  | GMT<br>(95%CI)     | N/D<br>(-)         | 16.3<br>(10.3-25.9)   | 23.85<br>(14.3-39.7) |
|                                 | 18-59 years      | Seroconversion n/N | N/D                | 22/23                 | 22/23                |
|                                 |                  | (%)                | (-)                | (95.7)                | (95.7)               |

|            |                           |            |                     |                    |
|------------|---------------------------|------------|---------------------|--------------------|
|            | GMT<br>(95%CI)            | N/D<br>(-) | 15.1<br>(8.8-25.7)  | 17.5<br>(9.2-33.2) |
| ≥ 60 years | Seroconversion n/N<br>(%) | N/D<br>(-) | 9/10<br>(90.0)      | 10/10<br>(100)     |
|            | GMT<br>(95%CI)            | N/D<br>(-) | 39.4<br>(9.5-163.4) | 48.5<br>(22.2-106) |
| Placebo    | Seroconversion n/N<br>(%) | N/D<br>(-) | 0/11<br>(0)         | N/D<br>(-)         |
|            | GMT<br>(95%CI)            | N/D<br>(-) | 0<br>(0)            | N/D<br>(-)         |

Timepoints refer to the number of days after the first dose of vaccine or placebo in the schedule; RBD: Receptor-binding domain; S: Spike; N: Nucleoprotein; GMT: Geometric mean titer; N/D: No determined.

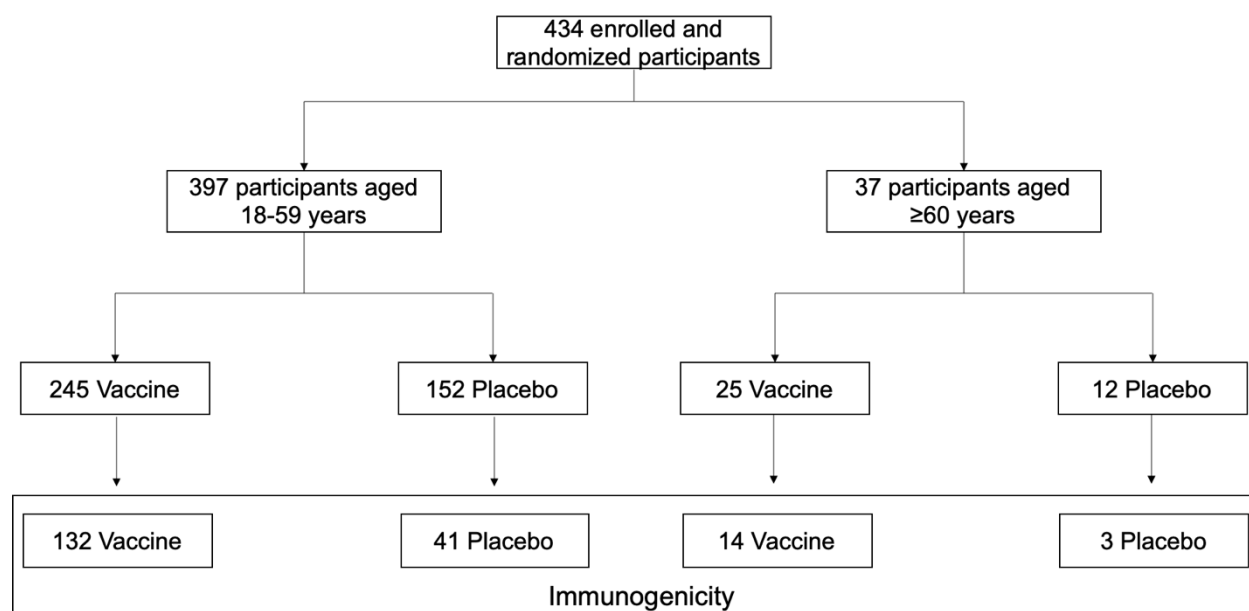

**Figure 1. Study profile.** Recruitment of volunteers as of January 08<sup>th</sup>, 2021.

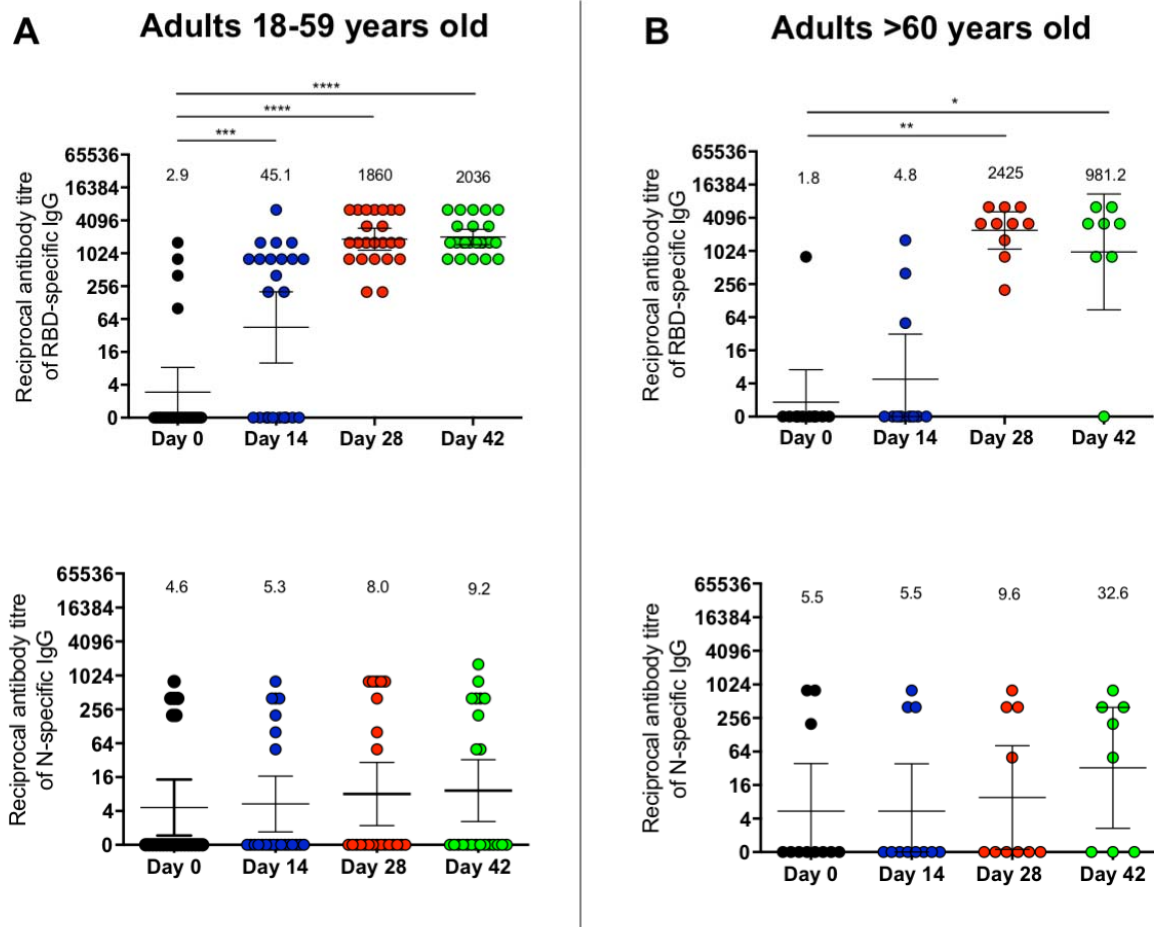

**Figure 2: Immunization with CoronaVac induces specific IgG against SARS-CoV-2 antigens in participants aged 18-59 and  $\geq 60$  after two immunizations in a 0-14 schedule.**

Titers of IgG antibodies after two doses of CoronaVac were evaluated for immunized participants (excluding seropositive participants at recruitment and placebo participants) at 0, 14, 28, and 42 days post the first immunization (p.i.) for adults aged 18-59 (**A**, **C**), and  $\geq 60$  (**B**, **D**) for specific IgG against the S1-RBD (upper panel) and the N protein (lower panel) of SARS-CoV-2. Data are expressed as the reciprocal antibody titer v/s time after the first dose. Error bars indicate the 95% CI of the Geometric Mean Titer (GMT). The spots represent the individual values of antibody titers, with the numbers above the spots showing the GMT estimates. The graph illustrates the results obtained for 23 participants in the 18-59 years old group and 11 participants in the  $\geq 60$  years old group. A Wilcoxon test was performed to compare the samples

of day 0 against the rest of the groups; \* $p < 0.05$ , \*\* $p < 0.005$ , \*\*\* $p < 0.0005$ , \*\*\*\* $p < 0.0001$ .

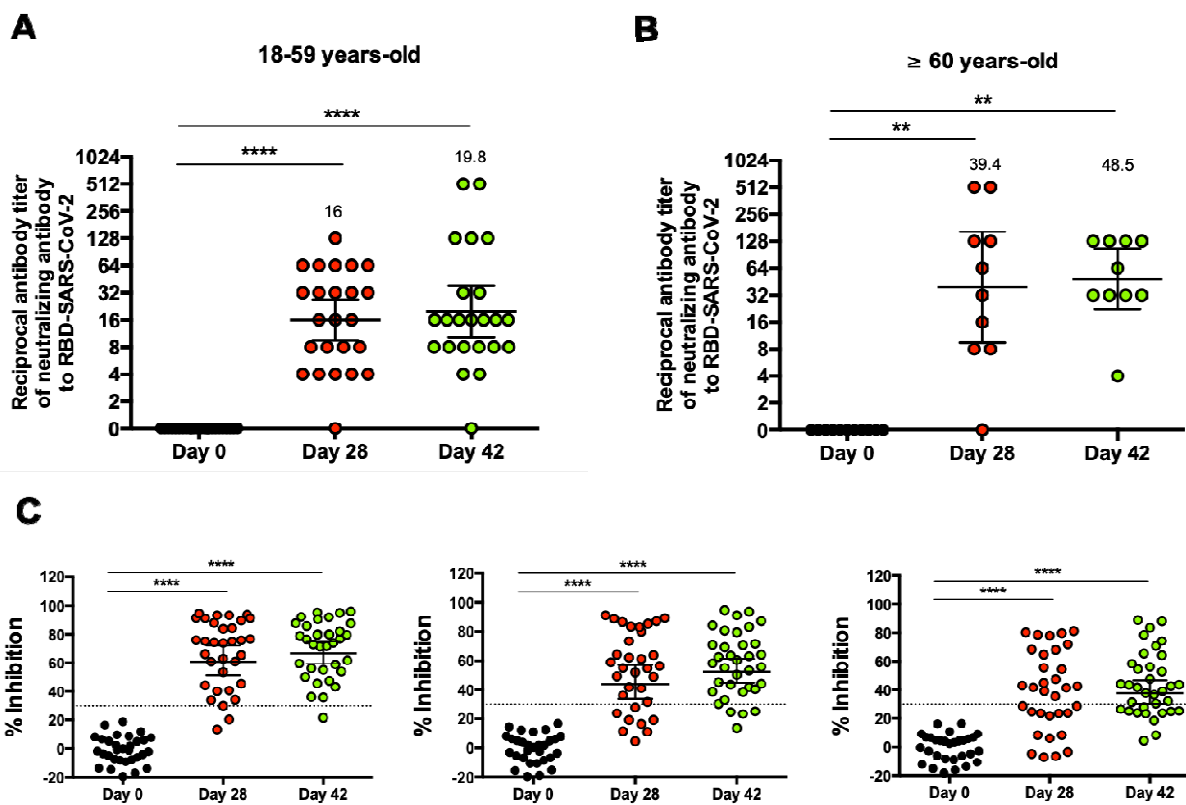

**Figure 3. Immunization with CoronaVac induces neutralizing antibodies against SARS-CoV-2 in participants aged 18-59 and  $\geq 60$  after two immunizations in a 0-14 schedule.** Neutralizing antibody titers were evaluated with a surrogate virus neutralization assay, which quantifies the interaction between S1-RBD and hACE2 pre-coated on ELISA plates. Results were obtained from participants aged (A) 18-59 and (B)  $\geq 60$  at 0, 28, and 42 days p.i. Data is represented as the reciprocal antibody titer v/s time after the first dose. Numbers above the bars show the Geometric Mean Titer (GMT), and the error bars indicate the 95% CI. Data were analyzed by a Wilcoxon test to compare against day 0; \* $p < 0.05$ , \*\* $p < 0.005$ , \*\*\* $p < 0.0005$ , \*\*\*\* $p < 0.0001$ . (C) Percentage of inhibition of the neutralizing antibodies at 1:4, 1:8, and 1:16 dilutions of sera from vaccinated participants. The graph represents the results obtained for 23 participants in the 18-59 years old group and 10 participants in the  $\geq 60$  years old group. Dotted lines indicate the cut-off value, set at 30%. Data were analyzed by a two-tailed Student's t-test against day 0; \*\*\*\* $p < 0.0001$

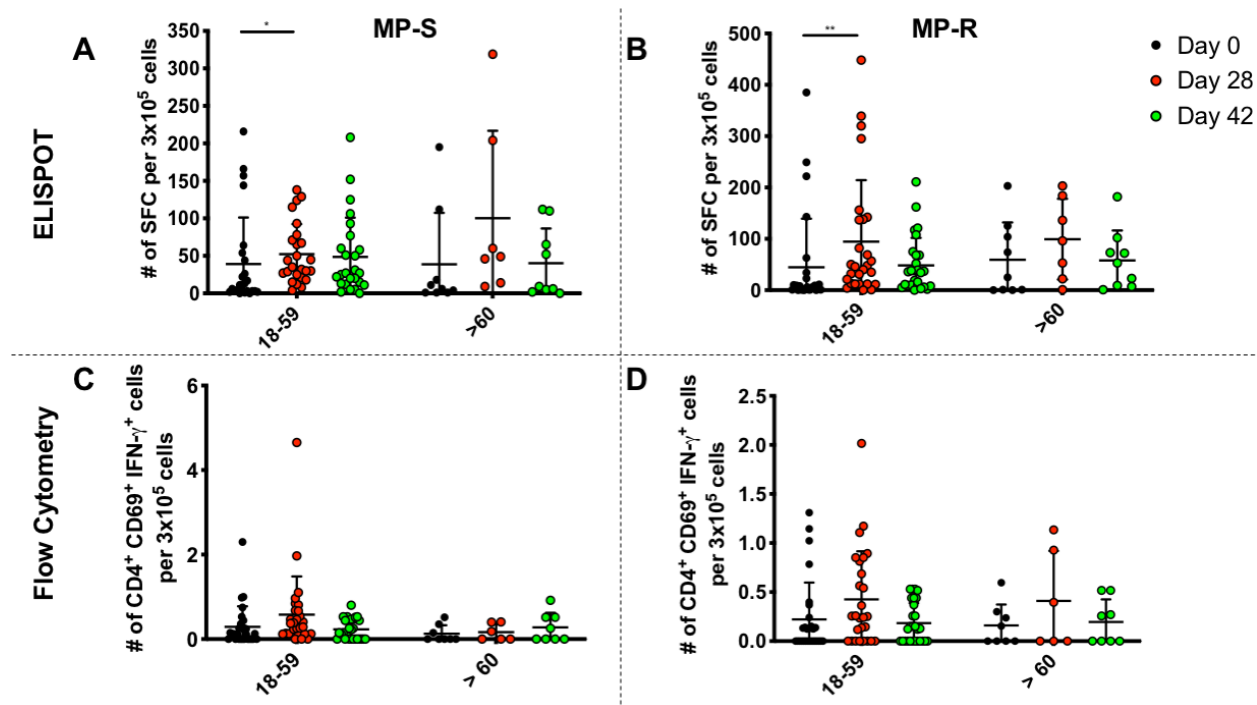

**Figure 4. Quantification of IFN- $\gamma$ -secreting CD4<sup>+</sup> T cells, upon stimulation with two Mega Pools of peptides derived from SARS-CoV-2 proteins (MP-S and MP-R) in participants aged 18-59 and  $\geq 60$  immunized with CoronaVac.** Absolute count of IFN- $\gamma$ -secreting cells, determined by ELISPOT as Spot Forming Cells (SFCs), was measured upon stimulation of PBMC with MP-S (A) and MP-R (B), for 48 h in samples obtained at 0, 28, and 42 days p.i. The absolute number of activated CD4<sup>+</sup> T cells (defined as CD3<sup>+</sup>, CD69<sup>+</sup>) secreting IFN- $\gamma$ , as determined by flow cytometry, was measured upon stimulation for 24 h with MP-S (C) and MP-R (D) in samples obtained at 0, 28, and 42 days p.i. A total of 25 samples stimulated with MP-S and 27 samples stimulated with MP-R were considered in the 18-59 years old group and 9 samples for the  $\geq 60$  years old group. Data shown represent means  $\pm$  SD. Data from each age group were analyzed separately by a Friedman test for repeated measures, followed by a *post hoc* Dunn's test corrected for multiple comparisons against day 0 for each age group; \*= $p < 0.05$ , \*\*= $p < 0.005$ .

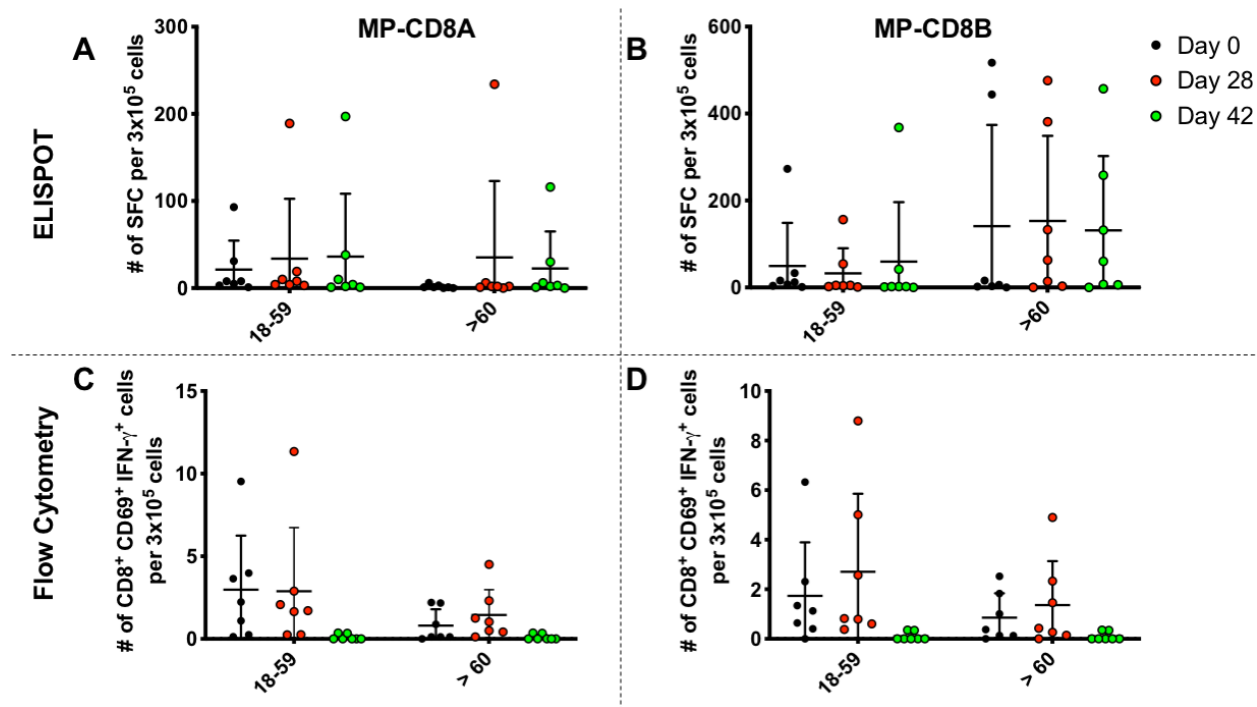

**Figure 5. Quantification of IFN- $\gamma$ -secreting CD8<sup>+</sup> T cells, upon stimulation with two Mega Pools of peptides derived from SARS-CoV-2 proteins (MP-CD8A and CD8B) in participants aged 18-59 and  $\geq 60$ , immunized with CoronaVac.** Absolute count of IFN- $\gamma$ -secreting cells, determined by ELISPOT as Spot Forming Cells (SFCs), was measured upon stimulation of PBMC with MP-CD8A (A) and MP-CD8B (B) for 48 h in samples obtained at 0, 28, and 42 days p.i.. The absolute number of activated CD8<sup>+</sup> T cells (defined as CD3<sup>+</sup>, CD69<sup>+</sup>) secreting IFN- $\gamma$ , determined by flow cytometry, was measured upon stimulation for 24 h with MP-CD8A (C) and MP-CD8B (D) in samples obtained at 0, 28, and 42 days p.i.. A total of 7 participants were considered in the 18-59 years old group and 7 participants for the  $\geq 60$  years old group. Data shown represent mean  $\pm$  SD. Data from each age group were analyzed separately by a Friedman test for repeated measures, followed by a *post hoc* Dunn's test corrected for multiple comparisons against day 0 for each age group.
